# Supplementary material
Source: PubMed Central journal article supplement (PMC7798419)
Supplement: NIHMS1651886-supplement-Table_1.pdf [file NIHMS1651886-supplement-Table_1.pdf]

Supplementary Table 1: Multivariate analysis

| <b>Patient characteristics</b>             |             |                     |                 |
|--------------------------------------------|-------------|---------------------|-----------------|
| <b>Variable</b>                            | <b>OR</b>   | <b>CI 95%</b>       | <b><i>p</i></b> |
| <b>Skin-to-tumor (continuous variable)</b> | <b>1.32</b> | <b>(1.03-1.69)</b>  | <b>0.029</b>    |
| <b>Age at surgery</b>                      | <b>0.94</b> | <b>(0.88-0.999)</b> | <b>0.047</b>    |
