# Supplementary material
Source: PubMed Central journal article supplement (PMC7798419)
Supplement: NIHMS1651886-supplement-Table_2.pdf [file NIHMS1651886-supplement-Table_2.pdf]

Supplementary Table 2: Percentage of patients with treatment failure by STT

| <b>STT (cm)</b> | <b>No. Patients</b> | <b>No. Treatment Failures</b> | <b>% Treatment Failures</b> |
|-----------------|---------------------|-------------------------------|-----------------------------|
| 4               | 2                   | 0                             | 0                           |
| 5               | 7                   | 0                             | 0                           |
| 6               | 14                  | 1                             | 7                           |
| 7               | 14                  | 1                             | 7                           |
| 8               | 15                  | 2*                            | 13                          |
| 9               | 11                  | 1*                            | 9                           |
| 10              | 7                   | 1                             | 14                          |
| 11              | 7                   | 3                             | 42                          |
| 12              | 4                   | 0                             | 0                           |
| 13              | 1                   | 0                             | 0                           |
| 14              | 1                   | 0                             | 0                           |
| 15              | 1                   | 0                             | 0                           |
| 16              | 1                   | 1*                            | 100                         |
| 17              | 0                   | 0                             | 0                           |
| 18              | 0                   | 0                             | 0                           |
| 19              | 0                   | 0                             | 0                           |
| 20              | 1                   | 1                             | 100                         |

\* includes patients with solitary kidney who experienced treatment failure
