# Supplementary material
Source: PubMed Central journal article supplement (PMC7798419)
Supplement: NIHMS1651886-supplement-Table_3.pdf [file NIHMS1651886-supplement-Table_3.pdf]

Supplemental table 3: Complications

| Clavien grade | Complication                                    | n (%)     |
|---------------|-------------------------------------------------|-----------|
| 1             | Perinephric hematoma                            | 6 (6.9)   |
|               | Pneumothorax, conservative management           | 1 (1.2)   |
|               | Atrial fibrillation                             | 1 (1.2)   |
|               | ARF                                             | 1 (1.2)   |
| 2             | Intestinal perforation, conservative management | 1 (1.2)   |
| 3             |                                                 | 0         |
| 4             |                                                 | 0         |
| 5             |                                                 | 0         |
| Total         |                                                 | 10 (11.7) |
